# Supplementary material for: Mechanistic investigation on up and down conversion of Er3+ and Gd3+ co-doped YTiNbO6 phosphors
Source: Royal Society of Chemistry journal article supplement (doi:10.1039/c5ra11603a), 2015-01-01
Supplement: c5ra11603a1.pdf [file c5ra11603a1.pdf]

## Supporting Information

### **Mechanism investigation on up and down conversion of Er<sup>3+</sup> and Gd<sup>3+</sup> co-doped YTiNbO<sub>6</sub> phosphors**

Zhichao Yu <sup>a</sup>, Guangjun Zhou <sup>a,\*</sup>, Juan Zhou <sup>b</sup>, Haifeng Zhou <sup>a</sup>, Peng Kong <sup>a</sup>, Yaqiang Wu <sup>a</sup>,  
Huining Huang <sup>a</sup>, Xiaoqiang Yu <sup>a</sup>, Xingshuang Zhang <sup>a</sup> and Ruoyao Zhang <sup>a</sup>

<sup>a</sup>State Key Laboratory of Crystal Materials, Shandong University, Jinan 250100, P. R. China.

<sup>b</sup>Center for Disease Prevention and Control of Jinan Military Command, Jinan 250014, P.  
R.China.

\* Corresponding author. Fax: +86 531 88361206

E-mail address: gjzhou@sdu.edu.cn

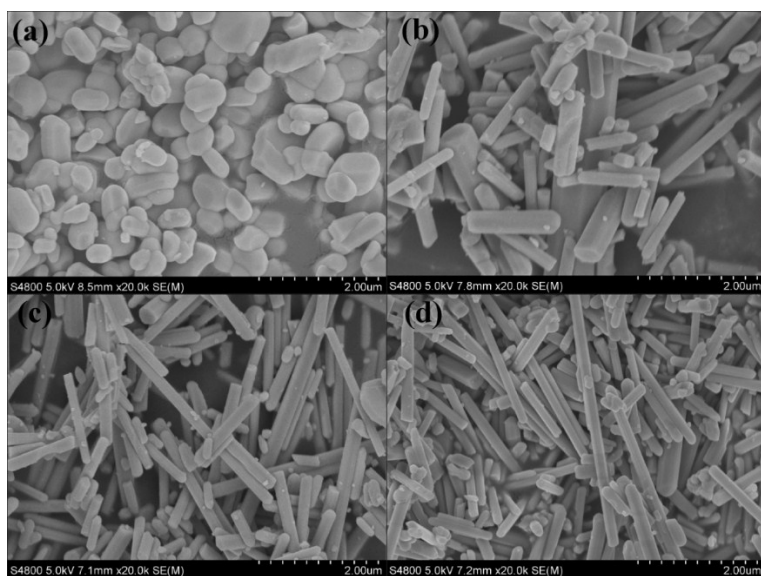

Fig. S1. SEM micrographs of the as-synthesized phosphors prepared with different concentration of  $Gd^{3+}$  ions: (a)  $YNbTiO_6:4\%Er,0.5\%Gd$ , (b)  $YNbTiO_6:4\%Er,1\%Gd$ , (c)  $YNbTiO_6:4\%Er,2\%Gd$ ,(d)  $YNbTiO_6:4\%Er,3\%Gd$ .

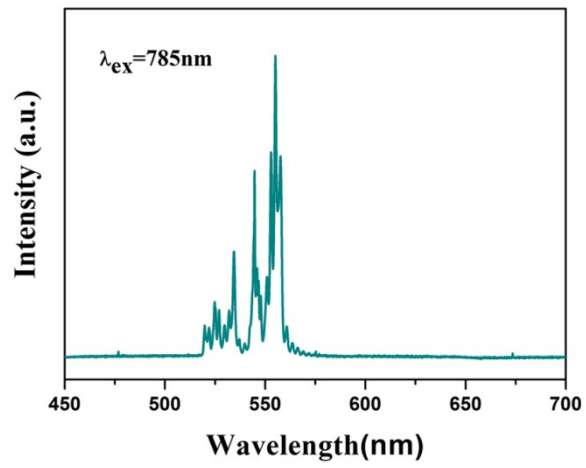

Fig.S2. The UC emission spectra with 785 nm excitation.

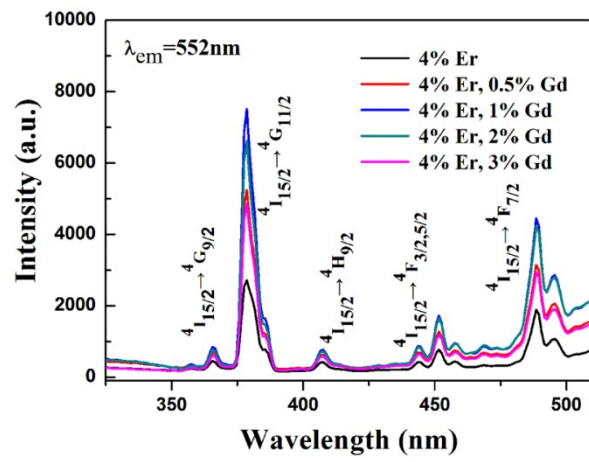

Fig.S3. Excitation spectra of YNbTiO<sub>6</sub>: 4%Er doped with different concentration of Gd<sup>3+</sup> ions ( $\lambda_{em}=552\text{ nm}$ ).
